# Supplementary material for: Isolation of viruses, including mollivirus, with the potential to infect Acanthamoeba from a Japanese warm temperate zone
Source: PLoS One. 2024 Mar 28;19(3):e0301185. doi: 10.1371/journal.pone.0301185 (PMC10977731; doi:10.1371/journal.pone.0301185)
Supplement: S3 Table — (XLSX) [file pone.0301185.s006.xlsx]

## Sheet: Sheet1
S3 Table. M. kamchatka- and M. sibericum-specific genes found in the Mo1-1 genome.
Locus tag	ORF identifier of M. kamchatka and M. sibericum	Predicted function
Mo0101_0241	mk_231	Uncharacterized protein
Mo0101_0400	mk_369	Uncharacterized protein
Mo0101_0454	mk_415	Uncharacterized protein
Mo0101_0484	mk_441	Uncharacterized protein
Mo0101_0021	ml_38	hypothetical protein
Mo0101_0048	ml_64	hypothetical protein
Mo0101_0091	ml_109	hypothetical protein
Mo0101_0103	ml_120	hypothetical protein
Mo0101_0117	ml_136	hypothetical protein
Mo0101_0119	ml_138	hypothetical protein
Mo0101_0120	ml_139	hypothetical protein
Mo0101_0126	ml_144	hypothetical protein
Mo0101_0138	ml_157	hypothetical protein
Mo0101_0141	ml_159	hypothetical protein
Mo0101_0153	ml_172	hypothetical protein
Mo0101_0172	ml_193	hypothetical protein
Mo0101_0224	ml_246	hypothetical protein
Mo0101_0237	ml_258	hypothetical protein
Mo0101_0295	ml_311	Zinc-finger domain containing protein
Mo0101_0297	ml_313	hypothetical protein
Mo0101_0471	ml_464	hypothetical protein
Mo0101_0487	ml_479	DNA methyltransferase
Mo0101_0504	ml_495	hypothetical protein
